# Supplementary material
Source: PubMed Central journal article supplement (PMC3719725)
Supplement: AAC.00761-13_zac999102053so1.pdf [file AAC.00761-13_zac999102053so1.pdf]

**TABLE S1: Antibiotic treatment-induced changes in total body weights in *M. tuberculosis*-infected guinea pigs**

| Month | Untreated      | RHZ            | PaMZ           | PaM            | Paz            | MZ             | PA             | M              | Z              |
|-------|----------------|----------------|----------------|----------------|----------------|----------------|----------------|----------------|----------------|
| -1.5  | 319.25 ± 19.04 |                |                |                |                |                |                |                |                |
| 0     | 512.33 ± 41.95 |                |                |                |                |                |                |                |                |
| 0.5   | 610.08 ± 58.09 | 428.75 ± 73.34 | 448.4 ± 39.66  | 469.35 ± 41.15 | 528.93 ± 58.52 | 509.05 ± 38.62 | 537.18 ± 12.62 | 536.08 ± 51.83 | 591.25 ± 79.92 |
| 1     | 674.43 ± 98.64 | 457.82 ± 63.56 | 486.67 ± 25.67 | 503.5 ± 10.77  | 534.4 ± 29.43  | 549 ± 26.15    | 592.93 ± 62.06 | 600.5 ± 37.47  | 601.08 ± 37.24 |
| 2     | 613.7 ± 89     | 484.5 ± 31.52  | 525.5 ± 11.61* |                |                |                |                |                |                |
| 1(+3) |                | 757.49 ± 79.9  | 750.9 ± 86.1   |                |                |                |                |                |                |
| 2(+3) |                | 706.6 ± 38.4   | 718.9 ± 50.3   |                |                |                |                |                |                |

Weights (arithmetic means and standard deviations in grams) of 4 guinea pigs for Month 0 to Month 2 and 10 guinea pigs for relapse time point are shown.

\*Differences between the RHZ and PaMZ groups was statistically significant ( $P = 0.05$ ).

R, rifampin; H, isoniazid; Z, pyrazinamide; Pa, Pa824; M, moxifloxacin.

(+3) indicates that guinea pigs was held for 3 months after treatment completion before sacrifice for relapse assessment.

**TABLE S2: Antibiotic treatment reduces lung and spleen weights in *M. tuberculosis*-infected guinea pigs**

| Organ                | Month | Untreated | RHZ        | PaMZ        | PaM       | Paz       | MZ        | PA        | M         | Z         |
|----------------------|-------|-----------|------------|-------------|-----------|-----------|-----------|-----------|-----------|-----------|
| Lung <sup>†</sup>    | - 1.5 | 2.44±0.4  |            |             |           |           |           |           |           |           |
|                      | 0     | 2.24±0.16 |            |             |           |           |           |           |           |           |
|                      | 0.5   | 2.53±0.52 | 1.83±0.28  | 1.91±0.19   | 2.1±0.32  | 2.43±0.43 | 2.1±0.26  | 2.12±0.38 | 1.97±0.16 | 2.8±0.6   |
|                      | 1     | 2.92±0.34 | 1.71±0.26  | 1.65±0.15   | 1.95±0.16 | 2.75±0.62 | 2.34±0.85 | 1.95±0.2  | 2.11±0.29 | 2.31±0.35 |
|                      | 2     | 2.97±0.5  | 1.89 ±0.37 | 1.74 ±0.04  |           |           |           |           |           |           |
|                      | 1(+3) |           | 1.78±0.3   | 1.78±0.2    |           |           |           |           |           |           |
|                      | 2(+3) |           | 1.76±0.2   | 1.77±0.2    |           |           |           |           |           |           |
| Spleen <sup>††</sup> | - 1.5 | 0.57±0.08 |            |             |           |           |           |           |           |           |
|                      | 0     | 0.95±0.37 |            |             |           |           |           |           |           |           |
|                      | 0.5   | 1.16±0.68 | 0.54±0.32  | 0.64 ± 0.15 | 0.83±0.51 | 1.33±0.31 | 0.63±0.12 | 0.92±0.2  | 0.78±0.56 | 1.92±0.93 |
|                      | 1     | 2.43±2.78 | 0.44±0.09  | 0.42 ± 0.05 | 0.53±0.15 | 0.82±0.12 | 0.51±0.11 | 0.56±0.12 | 0.59±0.09 | 0.73±0.31 |
|                      | 2     | 1.75±0.7  | 0.47±0.05  | 0.43 ± 0.06 |           |           |           |           |           |           |
|                      | 1(+3) |           | 0.41±0.2   | 0.55 ± 0.1  |           |           |           |           |           |           |
|                      | 2(+3) |           | 0.60.1±    | 0.59 ± 0.2  |           |           |           |           |           |           |

\*Normalized weights (arithmetic means and standard deviations in grams) of 4 guinea pigs per time point are shown.

<sup>†</sup>Differences between the RHZ and PaMZ groups were not statistically significant (P = 0.66, 0.72 and 0.48 at Month 0.5, Month1 and Month 2, respectively).

<sup>††</sup>Differences between the RHZ and PaMZ groups were not statistically significant (P = 0.61, 0.66 and 0.36 at Month 0.5, Month1 and Month 2, respectively).

R, rifampin; H, isoniazid; Z, pyrazinamide; Pa, Pa824; M, moxifloxacin.

(+3) indicates that guinea pigs was held for 3 months after treatment completion before sacrifice for relapse assessment.

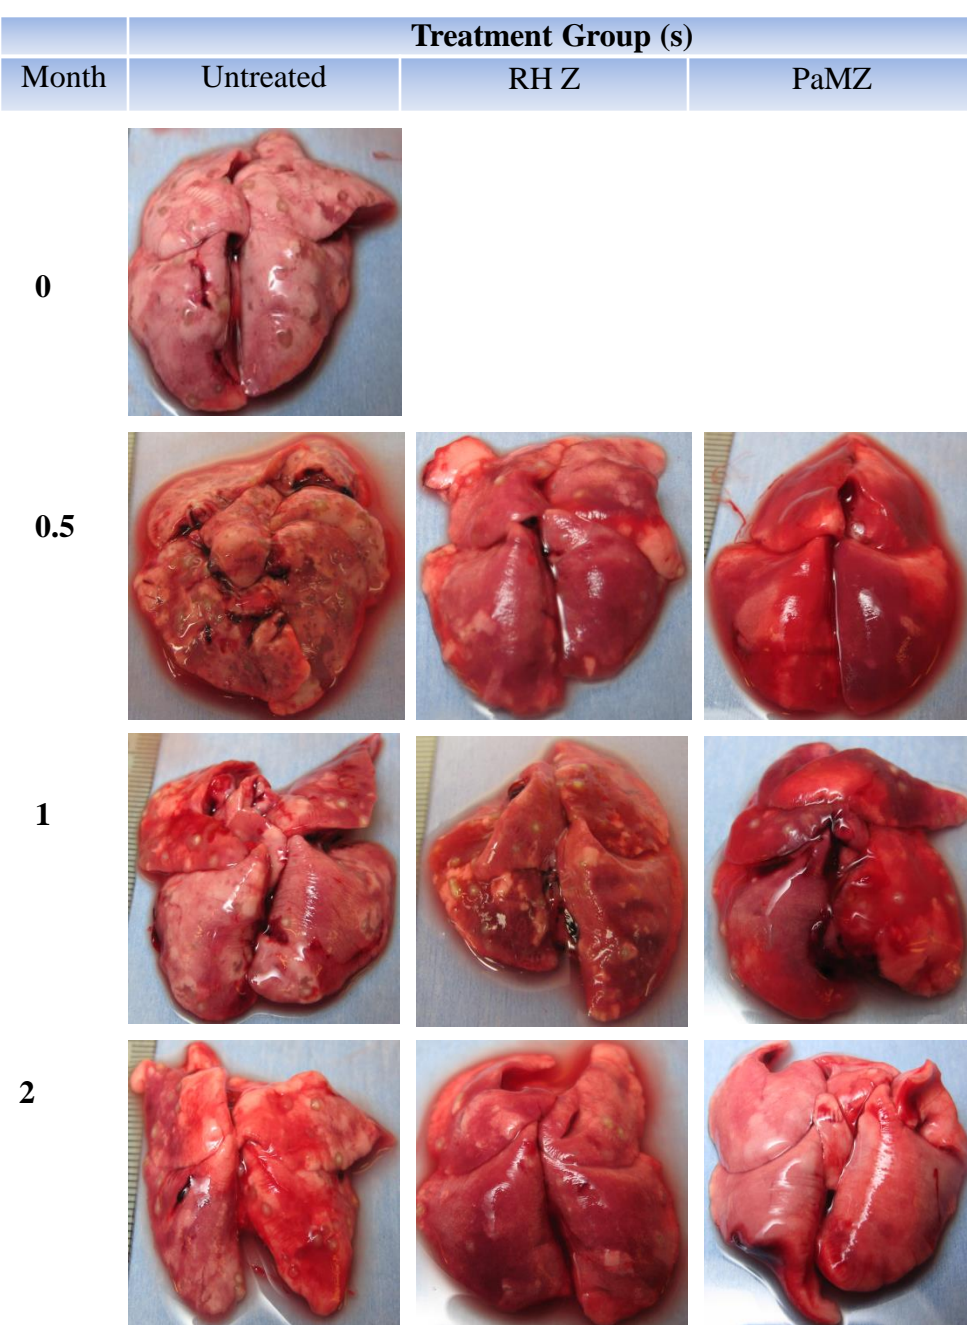

**FIGURE S1:** Gross pathology of infected guinea pig lungs during treatment. Images represent median lung weight samples of each indicated group.

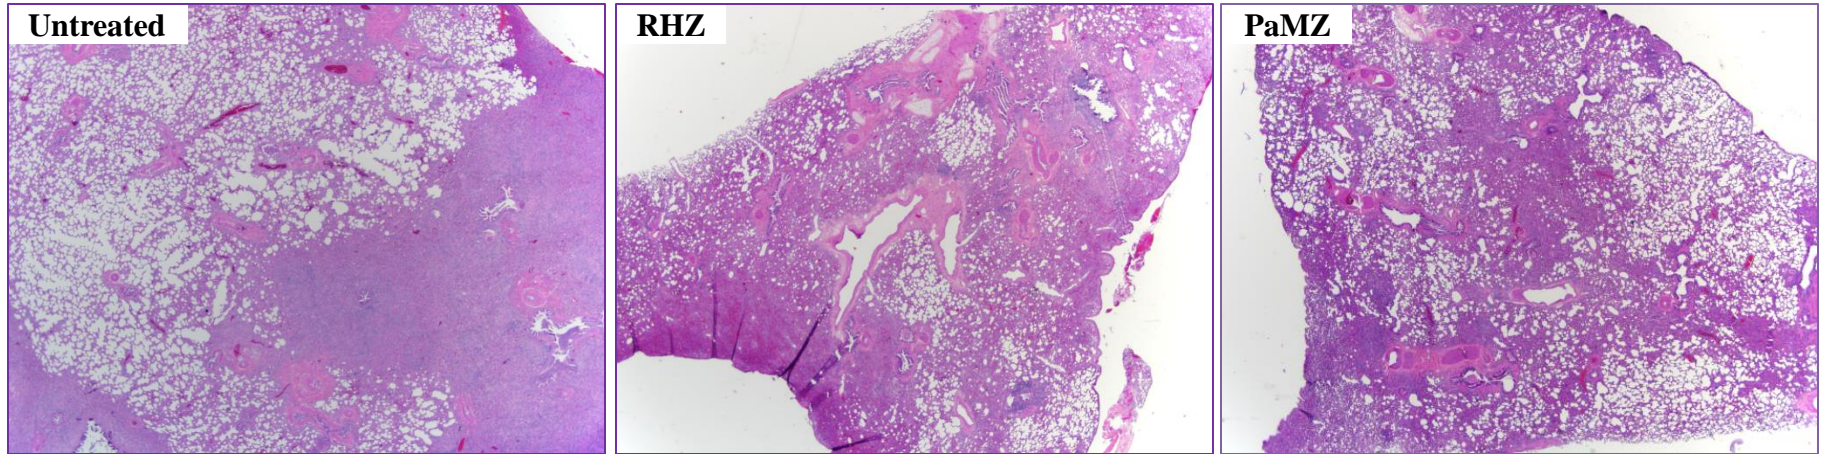

**FIGURE S2:** The combination regimens RHZ and PaMZ significantly reduce lung lesion size and number in *M. tuberculosis*-infected guinea pigs at Month 1 after treatment.

The untreated samples show diffuse inflammation and nodular aggregates and multiple small non-necrotizing granulomas. Both RHZ and PaMZ show diffuse inflammation with nodular aggregates and extension of the inflammation into airspaces. The multiple non-necrotizing granulomas seen in the untreated group are not seen in the RHZ- and PaMZ-treated groups.

Photomicrographs are representative sections of lungs from individual animals that best represents the mean values of 4 animals. Magnification =20 X.

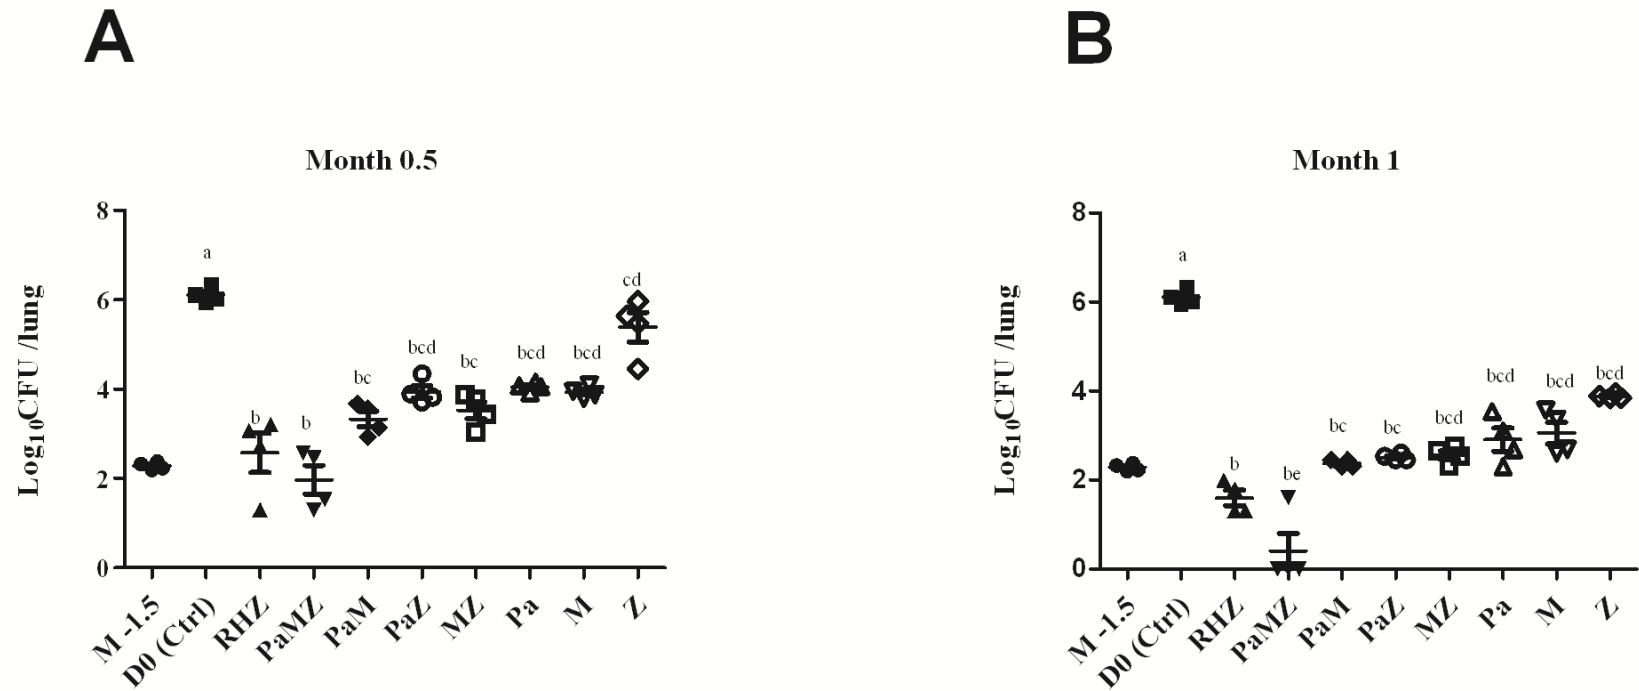

**FIGURE S3:** Mean ( $\pm$  SD) *Mycobacterium tuberculosis* lung colony-forming unit counts (CFU) after 2 weeks (Month 0.5, A) and 4 weeks (Month 1, B) of treatment.

Animals were infected via aerosol with  $\sim 10^2$  colony-forming units (CFU) of *M. tuberculosis* H37Rv and were either left untreated (Day 0 control) or treated with drugs beginning on Month 1.5 after infection.

Abbreviations: Pa, Pa-824; M, moxifloxacin; R, rifampin; H, isoniazid; Z, pyrazinamide.

Significant differences were noted ( $p < 0.05$ ) between (a) Month -1.5 (M -1.5) and Day 0 (D0) untreated control; (b) Day 0 untreated control and each treatment group; (c) PaMZ and single and two-drug treatment groups; (d) RHZ and single and two-drug treatment groups; (e) RHZ and PaMZ ( $p < 0.001$ ).
